# Supplementary material
Source: PubMed Central journal article supplement (PMC2771327)
Supplement: NIHMS139365-supplement-1.pdf [file NIHMS139365-supplement-1.pdf]

## Supplemental Figure 1: Optical voltage recordings from zebrafish embryos

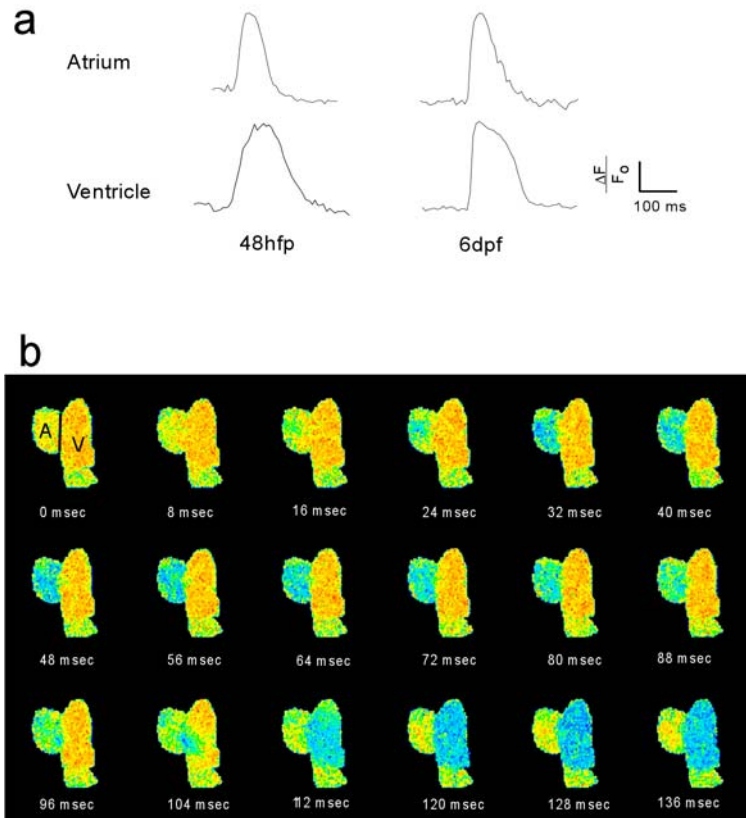

### Supplemental Fig 1: Optical voltage recordings in the zebrafish embryo.

**(1a)** We obtained high-resolution action potentials from embryonic atrium and ventricle as early as 48 hours post fertilization (hpf). Normal embryos display subtle differences in atrial and ventricular action potential profiles at this stage, which resemble the adult human transients in duration and morphology. **(1b)** Sequential optical maps obtained during a spontaneous cardiac depolarization. The impulse arises in the atrium and pauses at the atrioventricular boundary ( $t=32\text{ms}$ ), before emerging into the ventricle ( $t=104\text{ms}$ ). Activation maps demonstrate differential conduction velocities in atrium and ventricle ( $2.6 \pm 0.5\text{mm/s}$  and  $8.2 \pm 2.1\text{mm/s}$ , respectively), and confirm the emergence of physiologic AV conduction delay ( $88 \pm 38\text{msec}$ ). A = atrium, V=ventricle, and the line at 0 msec demarcates the atrioventricular boundary.

**Supplemental Figure 2: Valentine mutants show shortened action potential duration.**

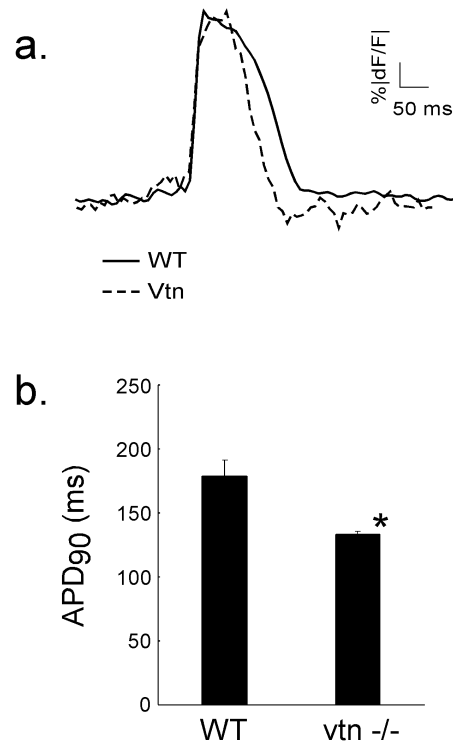

**Supplemental Fig 2: Valentine mutants display shortened action potential duration.**

**2a)** Representative action potential recordings from wildtype and *valentine* homozygotes are shown. **2b)** Action potentials are shortened in *valentine* homozygous mutants, \* denotes  $P < 0.05$ . Values expressed as mean  $\pm$  S.D.

**Supplemental Figure 3: Quantile-Quantile Plot Excluding GINS3 Locus**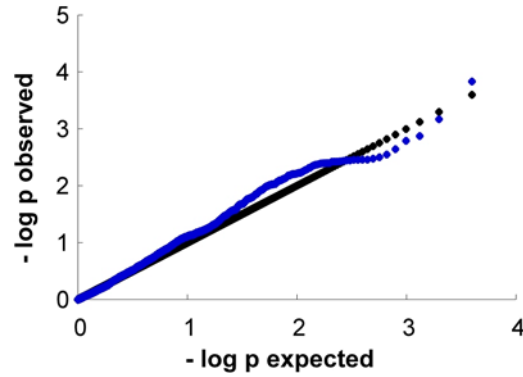

**Supplemental Fig3:** Quantile-quantile plot of observed versus expected p values from SNPs within 150kb of each human ortholog of the zebrafish repolarization genes, excluding GINS3. Association data are from the QTSCD GWAS. Blue data points are observed p values, black points indicate results that would be anticipated by chance alone. In contrast to Figure 3b, when GINS3 is excluded, the observed values do not deviate from the null hypothesis.

### Supplemental Figure 4: GINS3 Knockdown in Zebrafish

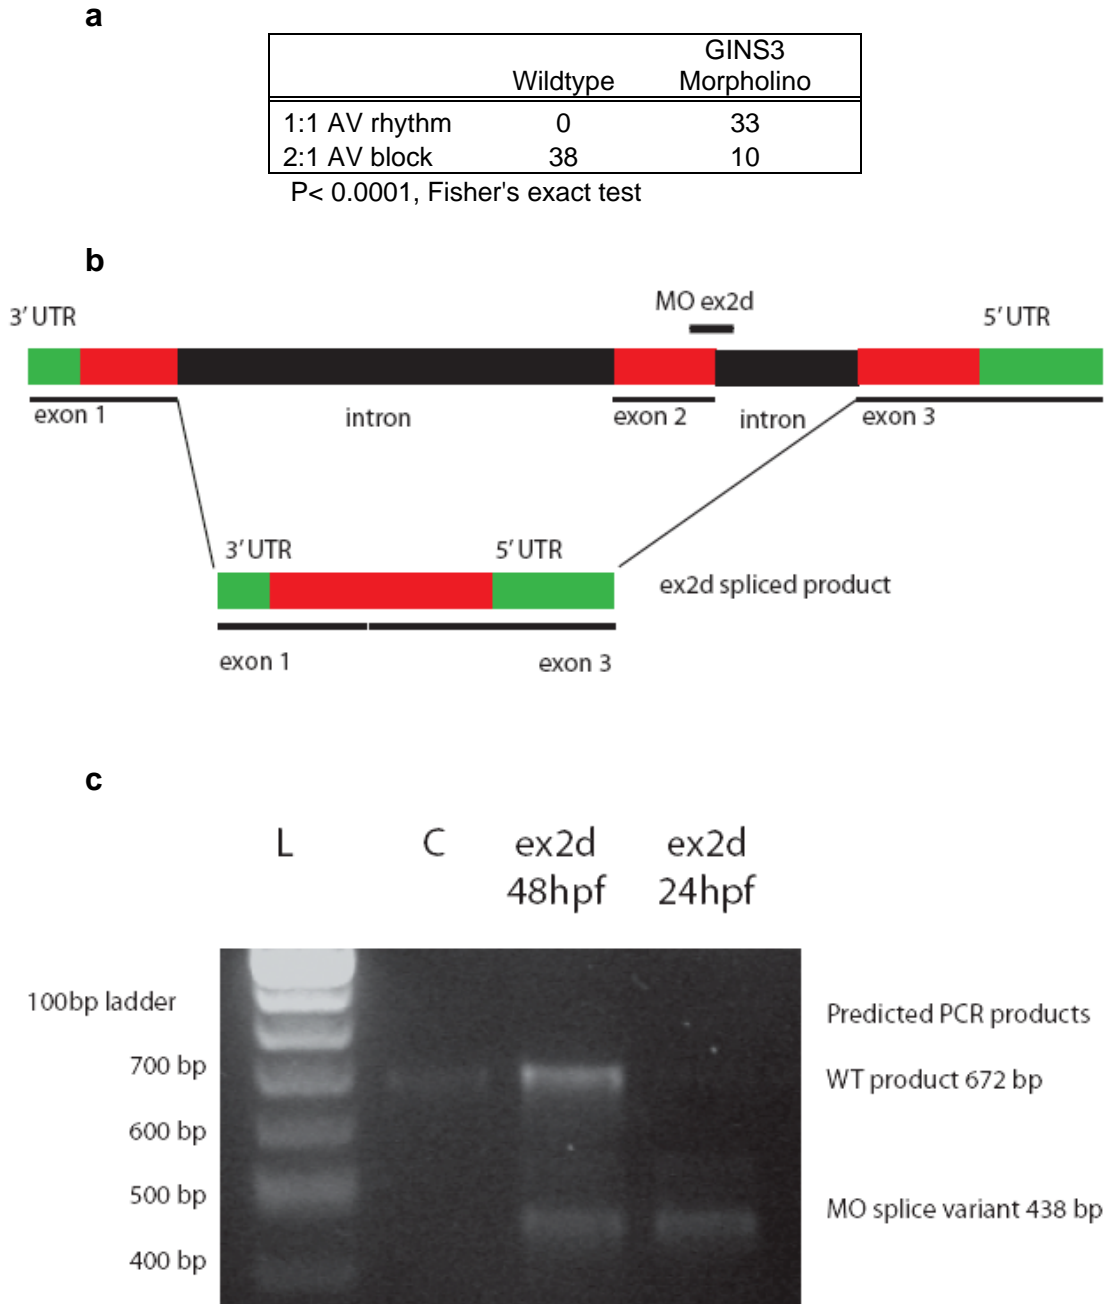

**Supplemental Figure 4: GINS3 Knockdown in Zebrafish.** (4a) Results of exposure of GINS3 morpholino injected embryos and wild type controls to 12uM dofetilide. Embryos are scored for cardiac rhythm, with 100% of wild type embryos showing 2:1 AV block, while the majority of GINS3 morpholino injected embryos did not develop 2:1 AV block, phenocopying GINS3 mutant embryos. 4b) Schematic showing the predicted effect of GINS3 morpholino injection on GINS3 mRNA processing and 4c) the observed exclusion of exon 2 in GINS3 MO injected embryos at 24 and 48 hpf, L = 100bp ladder, C = control, wild type embryo sample.

**Supplemental Table 1. Dofetilide responses for heg-san-vtn mutants.**

| <b>Gene</b>          | <b>Allele</b> | <b>Proportion of mutants with 2:1 AV block</b> |
|----------------------|---------------|------------------------------------------------|
| Valentine (CCM2)     | Insertional   | 0/40                                           |
| Valentine (CCM2)     | ENU           | 0/40                                           |
| Heg (Heart of Glass) | ENU           | 0/40                                           |
| Santa (CCM1)         | ENU           | 0/40                                           |
| Wild-type            | NA            | 40/40                                          |

Abbreviations: ENU: ethyl-nitrosourea. All fish were exposed to a dose of dofetilide (12uM) which results in uniform AV block in wild-type embryos. All findings were significant at  $p < 0.001$  when compared with wild type siblings.

**Supplemental Table 2. Evidence for Novel Cardiac Repolarization Pathway**

|   | Gene                      | Allele(s)              | 2:1 AV block with drug | Zebrafish genome ID | C. elegans ortholog | Probability of genetic interaction     | Other evidence of interaction                                                                                           | References for additional data                                                                                               |
|---|---------------------------|------------------------|------------------------|---------------------|---------------------|----------------------------------------|-------------------------------------------------------------------------------------------------------------------------|------------------------------------------------------------------------------------------------------------------------------|
| a | valentine (CCM2)          | hi296a                 | 0/39                   | AY648715            | None                |                                        | Independent zebrafish genetic interaction with other CCM genes                                                          | Mably JD et al., Development 2006;133:3139, Mably JD et al. Current Biol 2003;13:2138, Gotthardt M et al. JBC 2000;275:25616 |
| b | snriboD1                  | hi601                  | 0/40                   | AF506225            | snr-3               | g=0.81, k=0.79, n=0.80                 |                                                                                                                         |                                                                                                                              |
| c | casein kinase I           | hi1002, hi2069         | 0/40                   | AY099516            | kin-19              | g=0.80, k=0.83, m=0.83, n=0.80, p=0.77 |                                                                                                                         |                                                                                                                              |
| d | gins3                     | hi1241                 | 0/20                   | AY648732            | Y65B4B2.8           | p=0.76                                 |                                                                                                                         |                                                                                                                              |
| e | survivin                  | hi1326, hi2111, hi3018 | 20/60                  | AY057057            | bir-1               |                                        | Genetic interaction with j and l, possible physical interaction with j, regulates Kv channels through unknown mechanism | Chang JL et al., Exp Cell Res 2006;312:962<br>McMurtry MS et al., J Clin Invest. 2005 Jun;115(6):1479-91.                    |
| f | WRB                       | hi1482                 | NA                     | AY648739            | Y50D4A.2            |                                        |                                                                                                                         |                                                                                                                              |
| g | Suppressor of Ty6 homolog | hi1621, hi2505b        | 0/60                   | NM145118            | emb-5               | b=0.81, h=0.83, k=0.83, n=0.87, p=0.78 |                                                                                                                         |                                                                                                                              |
| h | surfeit 6                 | hi1769                 | NA                     | AY648750            | ZK546.14B           | g=0.83, n=0.92                         |                                                                                                                         |                                                                                                                              |
| j | nuf2                      | hi1780a                | 0/40                   | NM1007456           | None                |                                        | Genetic interaction with e and l                                                                                        | Chang JL et al., Exp Cell Res 2006;312:962                                                                                   |
| k | rpa1                      | hi2618                 | 0/40                   | AY648787            | F18A1.5             | b=0.82, m=0.79, n=0.91                 |                                                                                                                         |                                                                                                                              |
| l | cdca11                    | hi2769                 | 0/40                   | BC050181            | None                |                                        | Genetic interaction with e and j                                                                                        | Tulu US et al. Current Biol 2006;16:536                                                                                      |
| m | esco1                     | hi2865                 | 0/40                   | AY648804            | F08F8.4             | d=0.83, k=0.79                         |                                                                                                                         |                                                                                                                              |
| n | nop56                     | hi3101                 | 0/40                   | AY648814            | KO7C5.4             | b=0.80, c=0.80, g=0.87, h=0.92, k=0.91 |                                                                                                                         |                                                                                                                              |
| o | polyA BP                  | hi3202b                | 0/40                   | BC047811            | pab-1               |                                        |                                                                                                                         |                                                                                                                              |
| p | pkc λ                     | hi3208                 | 0/60                   | AF390109            | pkc-3               | c=0.77, d=0.76, g=0.78                 |                                                                                                                         |                                                                                                                              |

| Additional known interactions |                                                |  |  |  |  |                                                                                                                |                                                                                                                                          |
|-------------------------------|------------------------------------------------|--|--|--|--|----------------------------------------------------------------------------------------------------------------|------------------------------------------------------------------------------------------------------------------------------------------|
| q                             | santa (krit-1/CCM1)                            |  |  |  |  | Genetic interaction with a, r and s.<br>Physical interaction with a and r                                      | Mably JD et al., Development 2006;133:3139,<br>Mably JD et al. Current Biol 2003;13:2138,<br>Hilder TL et al. J Proteome Res 2007:6:4343 |
| r                             | pcd10 (CCM3)                                   |  |  |  |  | Physical interaction with a and q                                                                              | Hilder TL et al. J Proteome Res 2007:6:4343<br>Mably JD et al., Development 2006;133:3139,<br>Mably JD et al. Current Biol 2003;13:2138  |
| t                             | integrin cytoplasmic domain associated protein |  |  |  |  | Physical interaction with q and u                                                                              | Zhang J et al. Hum Mol Gen 2001;10:2953                                                                                                  |
| u                             | integrin beta 1                                |  |  |  |  | Physical interaction with t and v                                                                              | Cherubini A. et al. Mol Cell Biol 2005;16:2972                                                                                           |
| v                             | KCNH2                                          |  |  |  |  | Physical interaction with u                                                                                    | Cherubini A. et al. Mol Cell Biol 2005;16:2972                                                                                           |
| w                             | snx17                                          |  |  |  |  | Physical interaction with q and x                                                                              | Czubayko M. et al. Biochem Biophys Res Commun 2006;345:1264                                                                              |
| x                             | lrp5                                           |  |  |  |  | Physical interaction with w, y and z                                                                           | Gotthardt M et al. JBC 2000;275:25616                                                                                                    |
| y                             | psd95                                          |  |  |  |  | Genetic interaction with c, Physical interaction with multiple channels including Kv family and sodium channel |                                                                                                                                          |
| z                             | nos1ap                                         |  |  |  |  | Physical interaction with x                                                                                    | Gotthardt M et al. JBC 2000;275:25616                                                                                                    |

**Supplemental Table 3: Position of the Genomic Blocks encompassing 15 zebrafish repolarization genes**

| <b>Locus</b> | <b>GENE</b>    | <b>CHROM</b> | <b>START_build35</b> | <b>STOP_build35</b> | <b>START-150kb</b> | <b>STOP+150kb</b> |
|--------------|----------------|--------------|----------------------|---------------------|--------------------|-------------------|
| ZF#1         | <i>CDCA8</i>   | chr1         | 37,827,251           | 37,844,482          | <b>37677251</b>    | <b>37994482</b>   |
| ZF#2         | <i>CDCA1</i>   | chr1         | 160,023,382          | 160,057,205         | <b>159873382</b>   | <b>160207205</b>  |
| ZF#3         | <i>PRKCI</i>   | chr3         | 171,422,926          | 171,506,466         | <b>171272926</b>   | <b>171656466</b>  |
| ZF#4         | <i>GSKN1A1</i> | chr5         | 148,855,037          | 148,911,200         | <b>148705037</b>   | <b>149061200</b>  |
| ZF#5         | <i>CCM2</i>    | chr7         | 44,813,026           | 44,889,308          | <b>44663026</b>    | <b>45039308</b>   |
| ZF#6         | <i>ESCO2</i>   | chr8         | 27,687,976           | 27,718,341          | <b>27537976</b>    | <b>27868341</b>   |
| ZF#7         | <i>PABPC1</i>  | chr8         | 101,784,319          | 101,803,491         | <b>101634319</b>   | <b>101953491</b>  |
| ZF#8         | <i>SURF6</i>   | chr9         | 133,227,106          | 133,232,598         | <b>133077106</b>   | <b>133382598</b>  |
| ZF#9         | <i>GINS3</i>   | chr16        | 56,983,923           | 56,997,536          | <b>56833923</b>    | <b>57147536</b>   |
| ZF#10        | <i>RPA1</i>    | chr17        | 1,680,094            | 1,748,119           | <b>1530094</b>     | <b>1898119</b>    |
| ZF#11        | <i>SUPT6H</i>  | chr17        | 24,013,428           | 24,053,375          | <b>23863428</b>    | <b>24203375</b>   |
| ZF#12        | <i>BIRC5</i>   | chr17        | 73,721,871           | 73,733,310          | <b>73571871</b>    | <b>73883310</b>   |
| ZF#13        | <i>SNRPD1</i>  | chr18        | 17,446,257           | 17,464,206          | <b>17296257</b>    | <b>17614206</b>   |
| ZF#14        | <i>NOL5A</i>   | chr20        | 2,581,253            | 2,587,038           | <b>2431253</b>     | <b>2737038</b>    |
| ZF#15        | <i>WRB</i>     | chr21        | 39,674,139           | 39,691,486          | <b>39524139</b>    | <b>39841486</b>   |
